# Supplementary material for: Bemerkungen zu den Tempelstatuen von Privatleuten des Mittleren Reiches
Source: MDPI journal article supplement (doi:10.3390/biology11040615), 1998-01-01
Supplement: s1 [file s1]

## **ELECTRa registry Principal Investigators by Countries:**

**AZERBAIJAN** *Baku* : Dr. F. Aliyev ;

**BELGIUM** *Aalst* : Dr. B. Stockman ; Dr. F. Casselman ; Dr. R. Beelen; *Brussels* :

Dr. J. Czapla ;

*Ghent* : Dr. F. Van Heuverswyn ; *Liege* : Dr. Q. Desiron ;

**DENMARK** *Aalborg* : Prof. O. Eschen ; Dr. Thogersen; *Aarhus* : Dr. P. T.

Mortensen ; *Copenhagen* : Dr. J. Svendsen ; Dr. H. Høgh Petersen ; Dr. B.

Thornvig Philbert ;

**FRANCE** *Brest* : Prof. J. Mansourati ; Dr M. Fatemi ; *Dijon* : Prof. F. Garnier ; Dr

C. Guenancia ; Dr G. Laurent ; *Grenoble* : Dr. P. Defaye ; Dr. P. Jacon; *Lille* : Dr.

C. Marquie ; Prof. D. Klug ; Dr. Z. Soussi ; Dr. D. Lacroix ; *Marseille* : Prof. F.

Franceschi ; Dr. S. Prévôt ; *Massy* : Prof. J. Horvilleur ; .Dr. F. Salerno, Dr. V.

Manenti, Dr. J. Lacotte ; *Montpellier* : Prof. J-L. Pasquie ; Dr F. Massin ; Dr T. Tri

Cung ; *Paris* : Dr. F. Hidden-Lucet ; Dr D'Alessandro Cosimo ; Dr E.

Gandjbakhch ; Dr G. Duthoit ; *Rennes* : Prof. C. Leclercq ; Dr. N. Behar ; Dr. P.

Mabo ; *Rouen* : Prof. F. Anselme; Dr. K Garsey; Dr. B. Godin Gardea; Dr. A.

Savoure ; *Toulouse* : Dr. B. Casteigt ;

**GERMANY** *Bad Nauheim* : Dr. H. Burger ; Prof. T. Walther ; Prof. T.

Ziegelhoeffer ; *Berlin* : Dr. B. Peters ; *Bernau* : Mr. F. Hoelschermann; Dr. Moeller;

*Dusseldorf* : Prof. B. Osswald ; *Essen* : Dr. D. Schmitz ; Dr. R. Palea ; Dr. H.

Guelndner ; *Leipzig* : Prof. G. Hindricks ; Dr. S. Richter ; Dr. M. Döring ;  
*Volkingen* : Prof. K-D. Heib ;

**GREAT BRITAIN** *London* : Prof. A. Rinaldi ;

**GREECE** *Athens* : Dr. S. Sideris ; Dr. J. E. Kallikazaros ; Prof. D. Tousoulis ; Prof.  
K. A. Gatzoulis ; *Platani-Patra* : Prof. J-I. Chiladakis ; *Thessaloniki* : Prof. V.P.  
Vassilikos ; Prof. N. Frangakis, Dr. E. Pagourelas ;

**HUNGARY** *Szeged* : Prof. T. Forster ;

**ISRAEL** *Ramat Gan* : Prof. M. Glikson ; Dr. E. Nof ; Dr. R. Beinart ;

**ITALY** *Bari* : Dr. G. Luzzi ; Dr. R. Trotta ; Dr. Z. Palama ; *Bergamo* : Dr. G.  
Mascioli ; Dr. E. Lucca ; Dr. N. Bakhtadze ; Dr. F. Michelotti ; *Bologna* : Dr. I.  
Diemberger ; *Brescia* : Dr. A. Curnis ; *Catania* : Prof. V. Calvi ; Dr. A. Di Grazia ;  
Dr. A. Arestia ; *Firenze* : Dr. E. V. Dovellini ; Dr. L. Giurlani ; *Genoa*: Dr. G.  
Bertero ; Prof. C. Brunelli ; Dr. A. Porcile ; Dr. P. Sartori ; *Lecce* : Dr. E. C.L. Pisano ;  
Dr. F. Magliari ; Dr. G. Milanese ; Mr. M. Lauretti ; *Venice* : Dr. A. Rossillo ; Dr.  
G. Gasparini ; Dr. C. Ardito, Dr. P. China ; *Milan*: Dr. G. Magenta ; Dr. C. Ardito ;  
Dr. S. Vargiu ; Dr. E. Mulargia ; *Milan*: Dr. P. Della Bella ; *Naples* : Dr. V.  
Caprioli ; *Novara* : Dr. A. Magnani ; Dr. E. Occhetta ; Prof. P. N. Marino ; *Pavia* :  
Dr. M. Landolina ; Dr. B. Petracci ; Dr. R. Rordorf ; Dr. A. Vicentini ; *Pisa* : Dr. A.  
Di Cori ; Dr. L. Segreti ; Dr. E. Soldati ; Dr. G. Zucchelli ; Dr. S. Viani ; Dr. L.  
Paperini ; *Rome* : Prof. A. Ciccaglioni ; *Rome* : Dr. G. Pelargonio ; Dr. F. Perna ;  
Dr. G. Bencardino ; Dr. M. L. Narducci ; *Turin*: Dr. P. G. Golzio ; Dr. E.  
Pellisero ; Dr. F. Gaita ; Dr. D. Castagno ; *Trento* : Dr. L. Gramegna ;

**LITHUANIA** *Vilnius* : Prof. G. Marinskis ;

**NORWAY** *Oslo* : Dr. E. S. Platou ; Dr. T. M. Knutsen ; Dr. T. Steen ; Dr. P.

Vanberg ;

**POLAND** *Gdansk* : Dr. M. Kempa ; Dr. S. Budreijko ; *Krakow* : Prof. B. Malecka ;

Dr. K. Boczar ; Dr. A. Ząbek ; *Lublin* : Dr. A. Tomaszewski ; Prof. A.

Polewczyk ; Dr. M. Czajkowski ; Dr. W. Brzozowski ; Dr. A. Polewczyk

Tuchalska ; Dr. M. Polewczyk ; *Poznan* : Prof. P. Mitkowski ; Dr. A.

Katarzynska-Szymanska ; Dr. L. Chmielewska-Michalak ; *Warsaw* : Prof. A.

Maciag ; Prof. M. Grabowski ; Dr. G. Opolski ; Dr. A. Kołodzińska ; *Wroclaw* :

Dr. D. Jagielski ; Dr. K. Nowak ;

**PORTUGAL** *Lisboa* : Dr. B. Valente ; Prof. M. Martins Oliveira ; Dr. P. Cunha ;

Dr. A. Lousinha ;

**RUSSIAN FEDERATION** *Rostov-on-Don* : Prof. V. Korshunov ;

**SPAIN** *Barcelona* : Dr. A. Moya ; Dr. I. Roca ; Dr. M. Moradi ; *Madrid* : Prof. I.

Fernandez Lozano ; Prof. J. Toquero Ramos ; Prof. V. Castro Urda ; Dr. L. Diego

Solis ; *Madrid* : Dr. E. Gonzalez ; Dr. J. Silvestre ; Dr. O. Al Razzo ; *Valencia* : Dr.

O. Cano ; Dr. J. Olagüe de Ros ; Dr. M-J. Sancho-Tello de Carranza ; Dr. J. Osca

Asensi ;

**SWEDEN** *Goteborg* : Dr. J. Gäbel ; *Stockholm* : Prof. F. Gadler ; *Uppsala* : Dr. D.

Mortsell ; Dr. P. Teder ; Mrs Anette Lorentzon ;

**SWITZERLAND** *Bern* : Prof. J. Fuhrer ; *Lugano* : Dr. F. Regoli ; Dr. M.L. Caputo ;

Dr. T. Moccetti ; *Zurich* : Prof. C. Starck ;

**UKRAINE** *Kiev* : Dr. V. Zalevskiy ;
